# Supplementary material for: LC–MS-Based Urine Metabolomics Analysis for the Diagnosis and Monitoring of Medulloblastoma
Source: PubMed Central journal article supplement (PMC9353006; doi:10.3389/fonc.2022.949513), 2022-07-22

**Fig. S1** Assessment of QC samples. (Trend plot showing the variation of t [1] over all QC Samples on urine metabolome.)

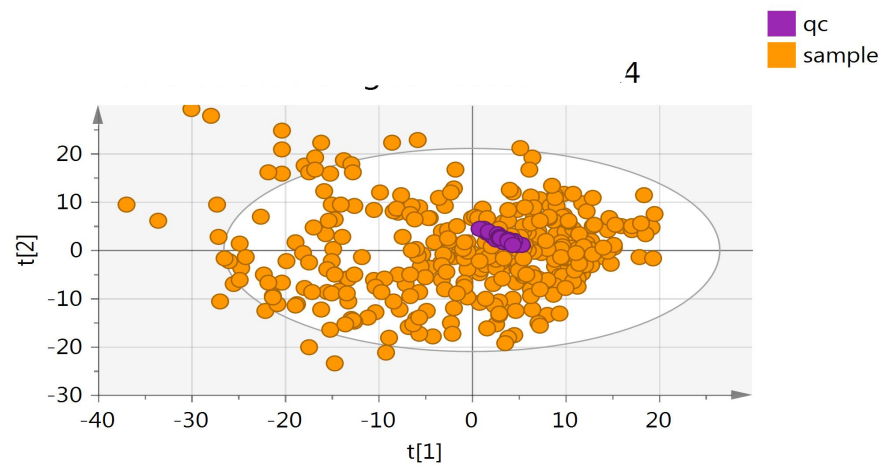

**Fig. S2** Analysis of metabolic profiling variation of medulloblastoma and health control. **(a.** Score plot of supervised OPLS-DA overview of urine metabolic profiling between medulloblastoma and health control. **b.** One hundred permutation tests of the OPLS-DA model based on medulloblastoma and health control urine metabolome. **c.** Top five shifted metabolic pathways in medulloblastoma compared with health control. **d.** ROC plot with discovery group for distinction of medulloblastoma and health control based on tetrahydrocortisone, cortolone, N-acetylasparagine).

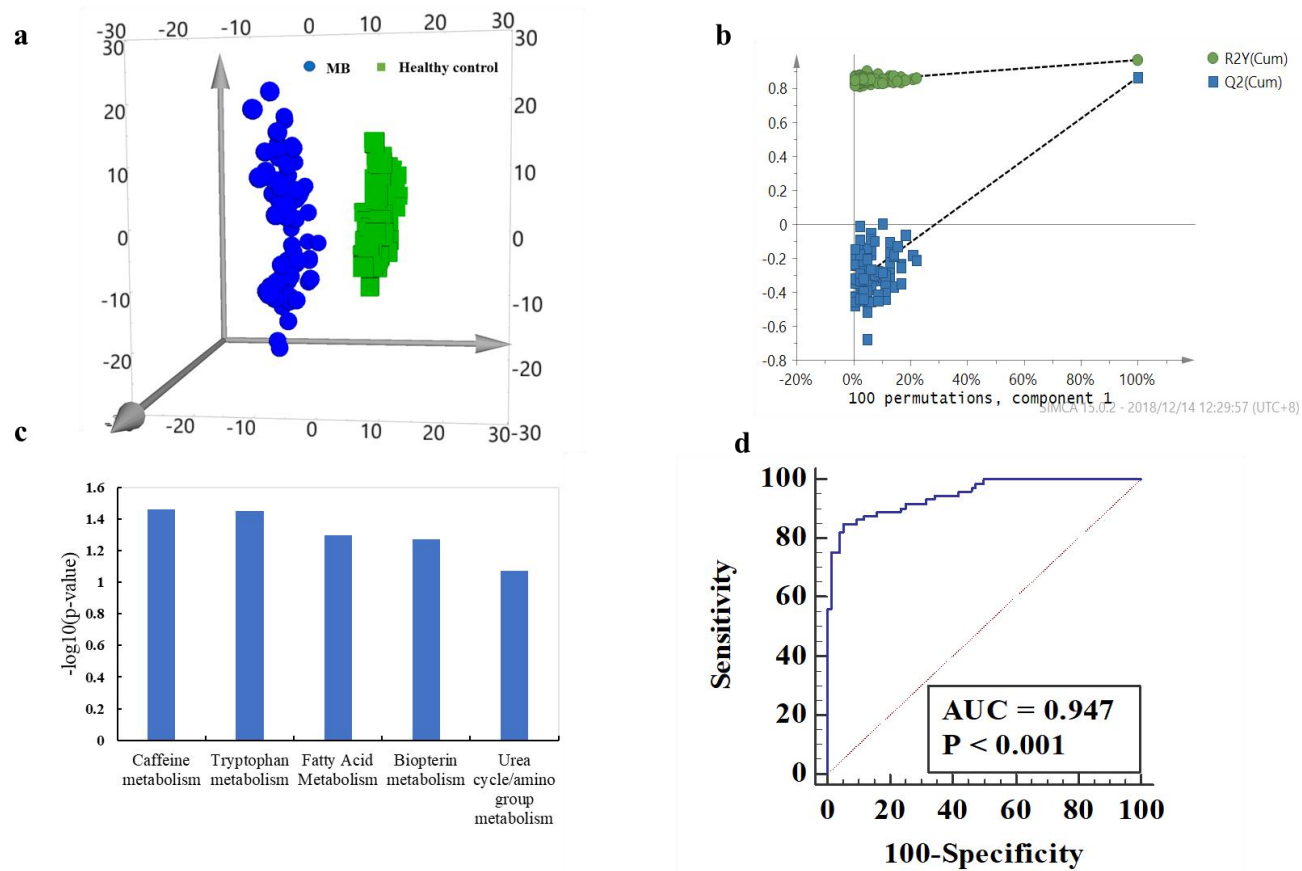

**Fig. S3.** Analysis of metabolic profiling variation of medulloblastoma and brain benign diseases. **(a.** Score plot of supervised OPLS-DA overview of urine metabolic profiling between medulloblastoma and brain benign diseases. **b.** One hundred permutation tests of the OPLS-DA model based on medulloblastoma and brain benign diseases urine metabolome.  $R^2=(0.0,0.649)$   $Q^2=(0.0,-0.28)$  **c.** the metabolic pathway in medulloblastoma comparing with benign diseases. **d.** ROC plot with discovery group for distinction of medulloblastoma and brain benign diseases based on tetrahydrocortisone, cortolone,18-carboxy dinor Leukotriene B4.)

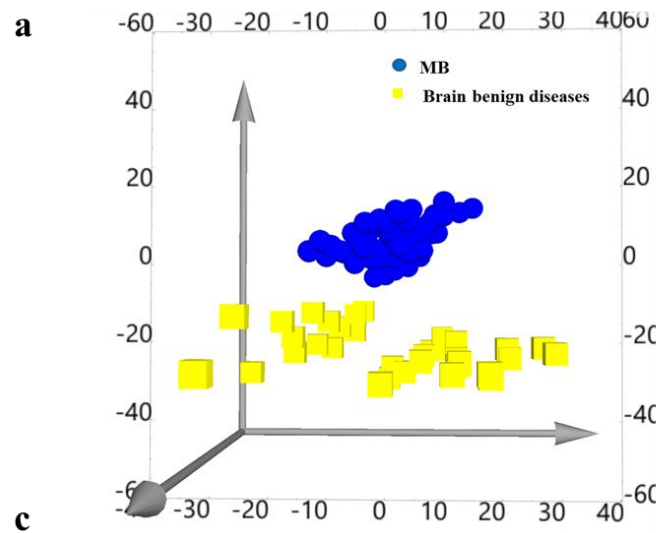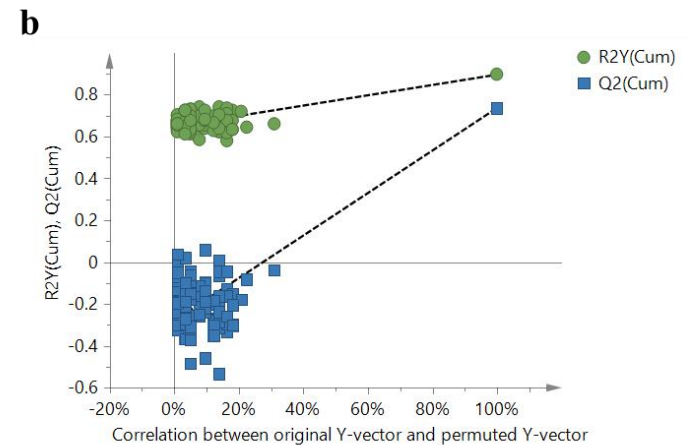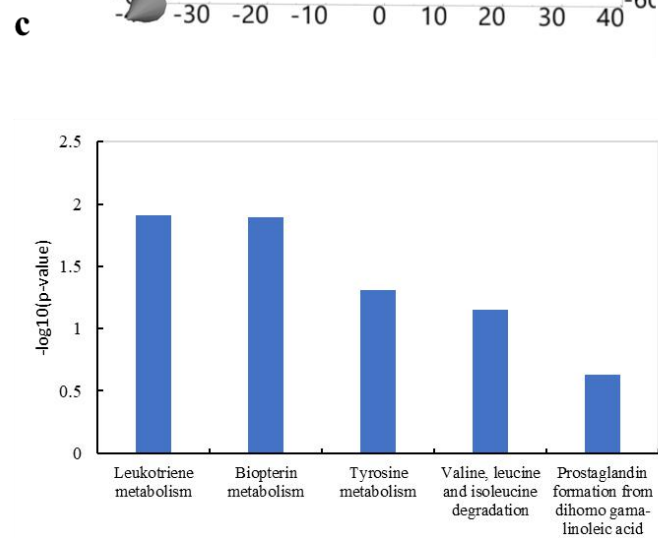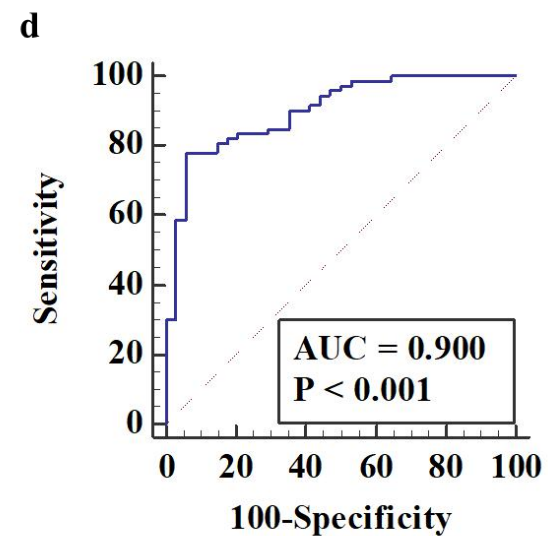

**Fig. S4** Analysis of metabolic profiling variation of medulloblastoma and other brain malignant tumor. **(a.** Score plot of supervised OPLS-DA overview of urine metabolic profiling between medulloblastoma and other brain malignant tumor. **b.** One hundred permutation tests of the OPLS-DA model based on medulloblastoma and other brain malignant tumor urine metabolome.  $R^2=(0.0,0.702)$   $Q^2=(0.0,-0.28)$  **c.** the metabolic pathway in medulloblastoma comparing with other brain malignant tumor. **d.** ROC plot with discovery group for distinction of medulloblastoma and other brain malignant diseases based on L-Dopa, 20-Oxo-leukotriene E4, cortolone, tetrahydrocortisone.)

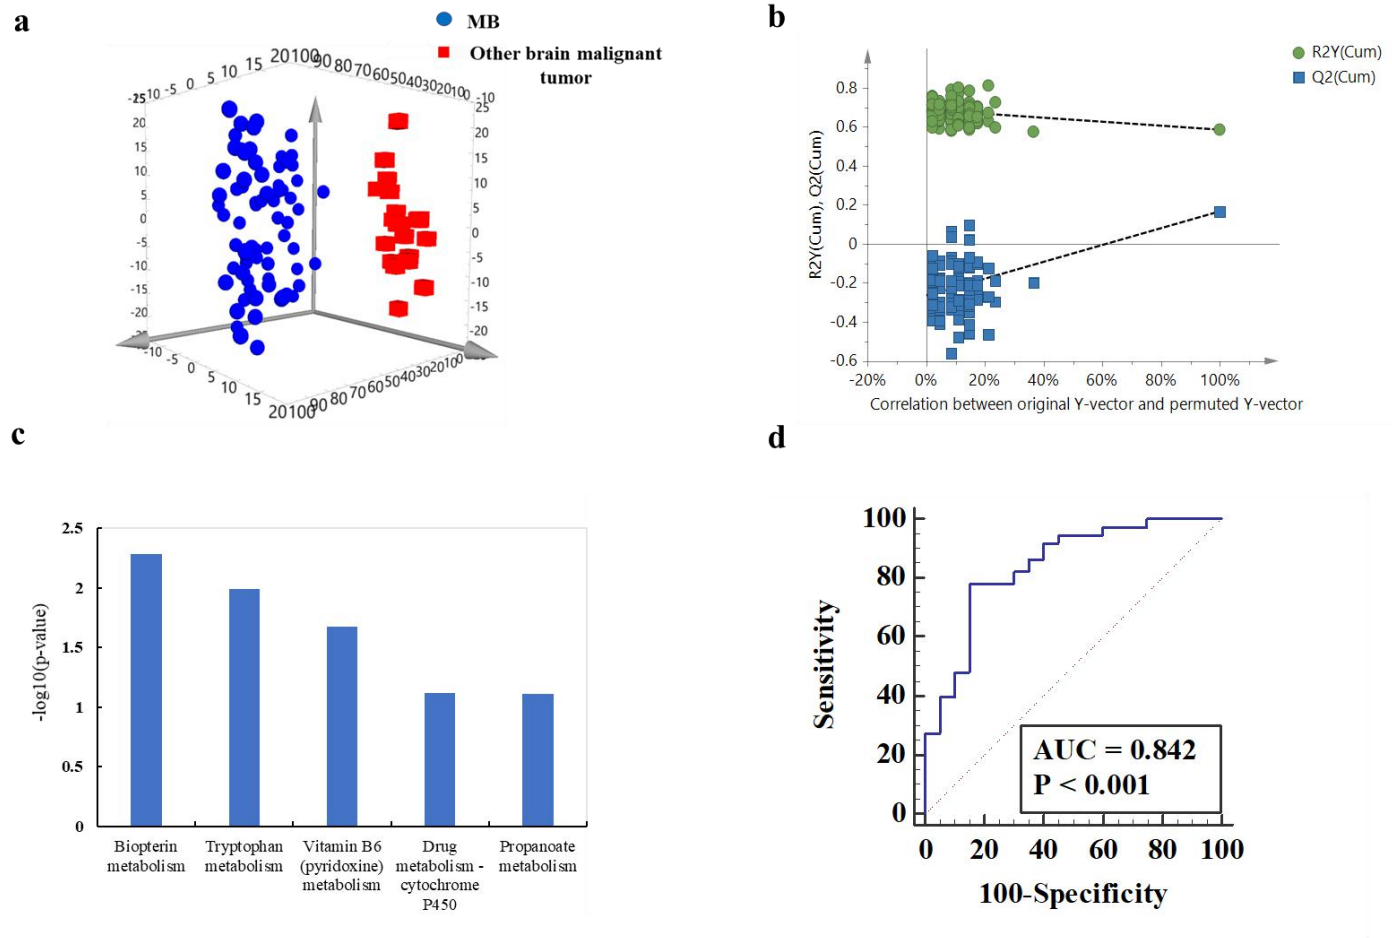

**Fig. S5** The average intensity heatmap of the specific urinary metabolites of MB

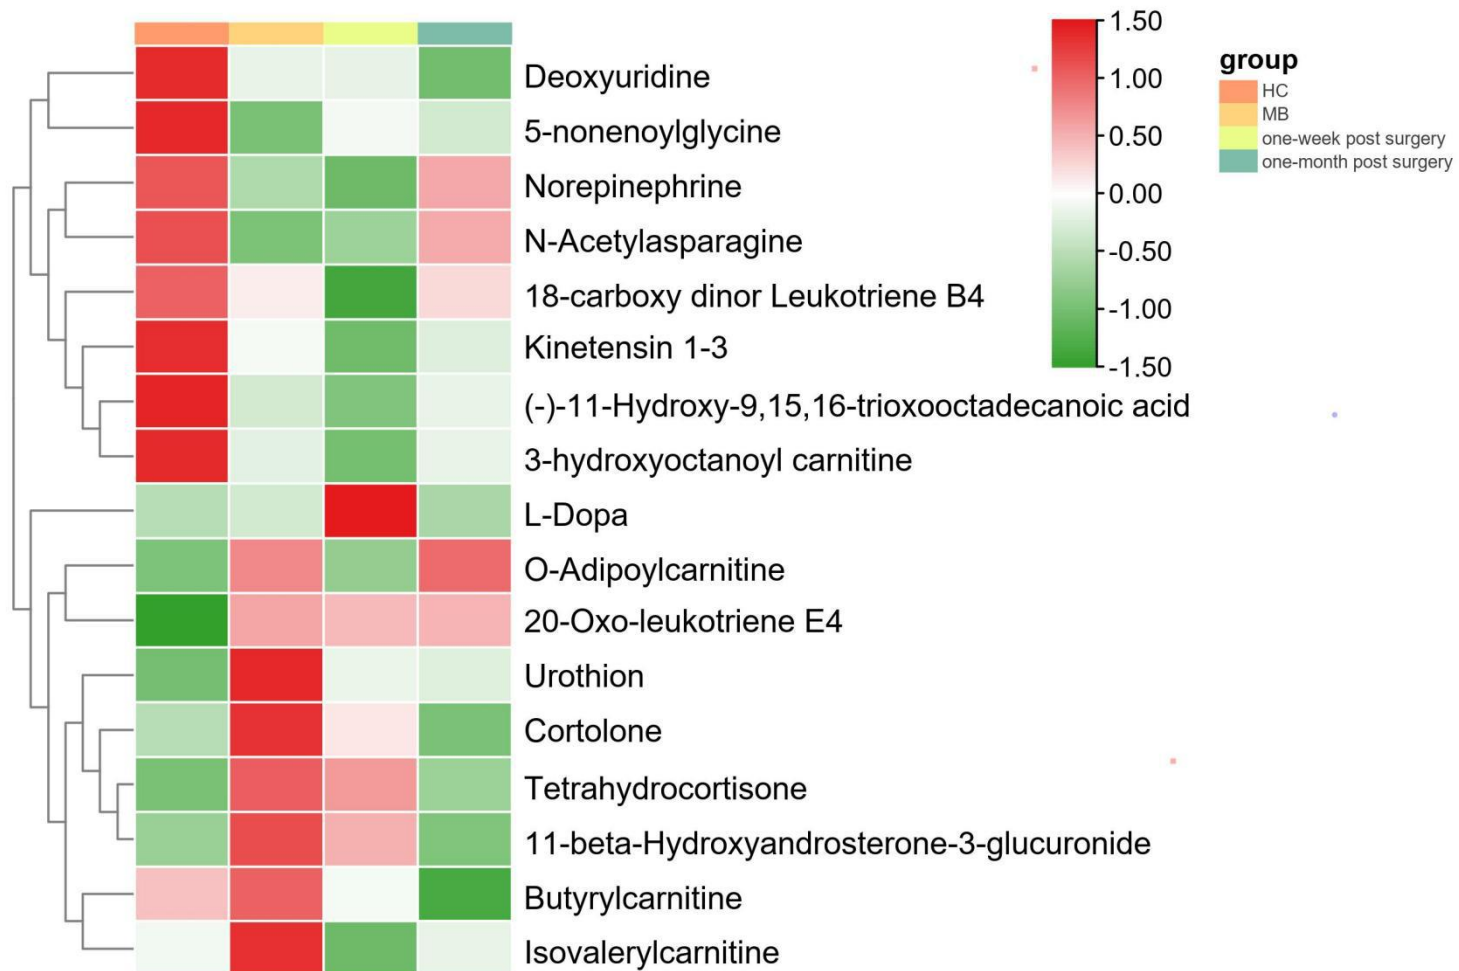

Fig S6. MS2 spectra of tetrahydrocortisone (a) and cortolone (b) in QC sample and standard compounds (STD) ( a )

tetrahydrocortisone 6.56\_364.2237n 347.2204336

(1) QC

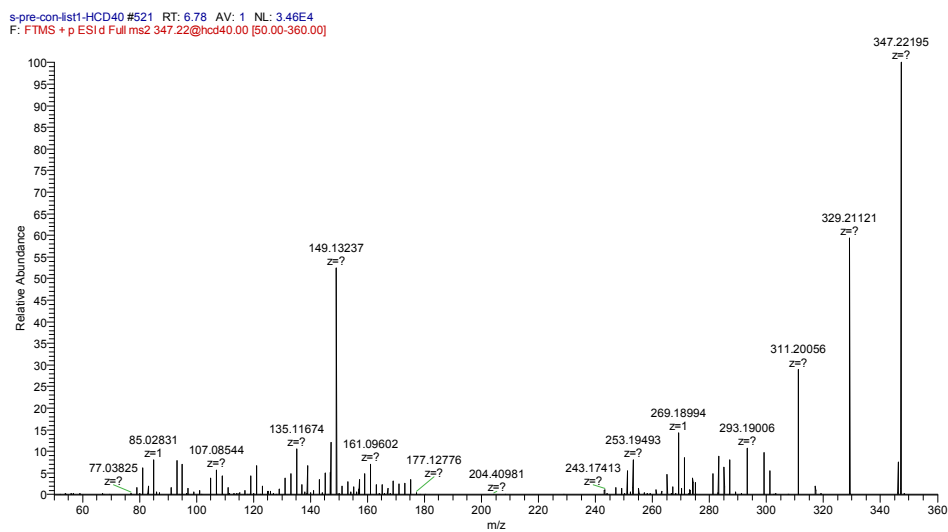

(2) STD

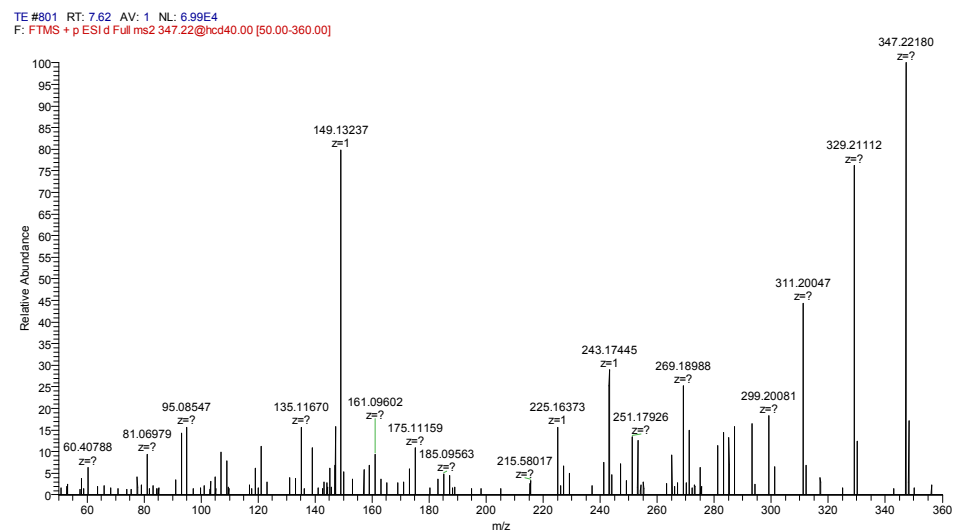

b ) cortolone 6.54\_349.2360m/z 349.2359908

(1) QC

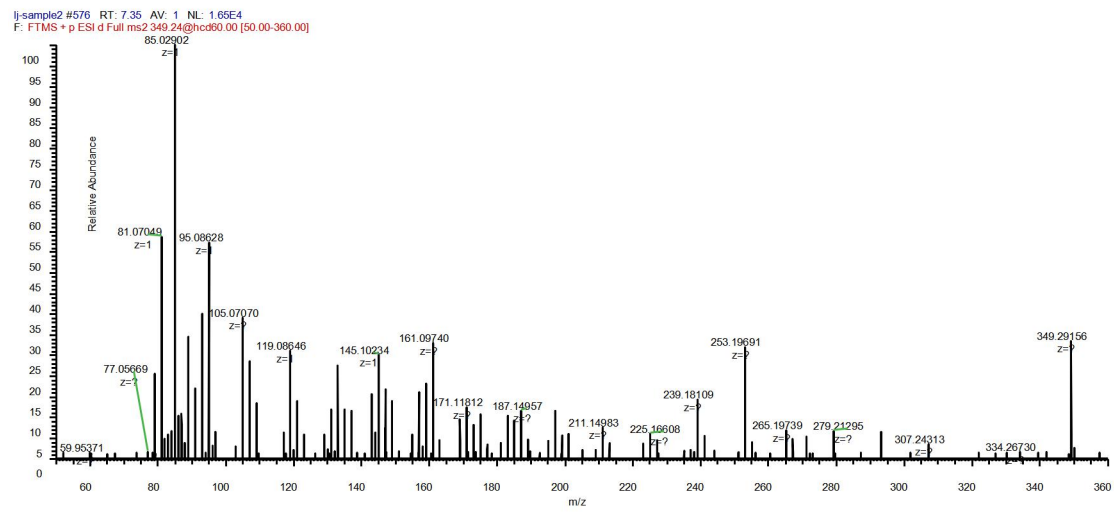

(2)STD

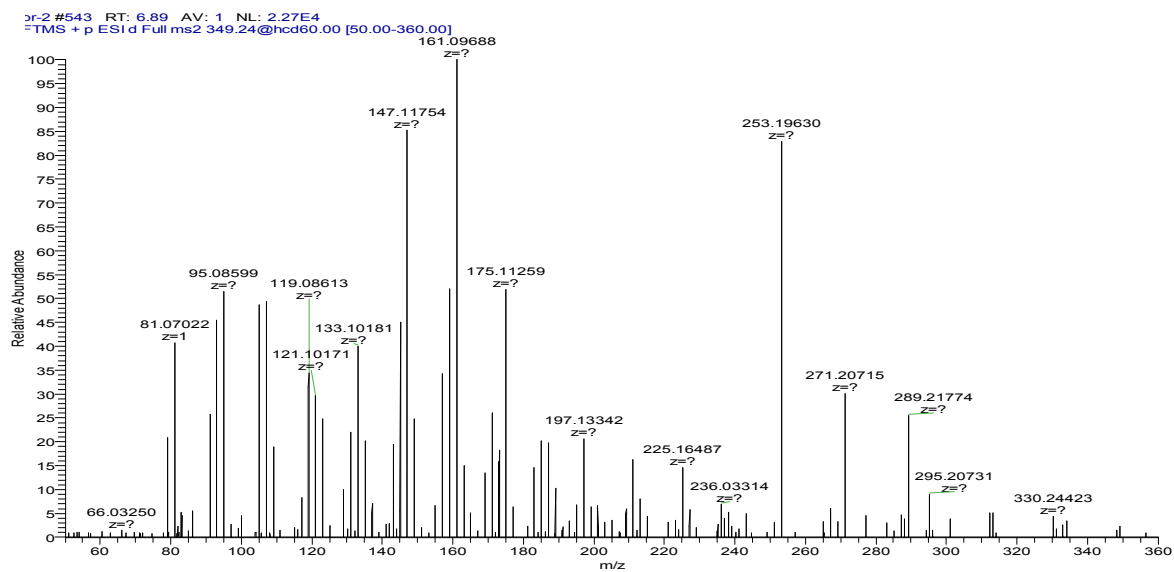

Supplement: DataSheet_1.pdf [file DataSheet_1.pdf]
